# Supplementary material for: Dextran Sulphate Sodium Acute Colitis Rat Model: A Suitable Tool for Advancing Our Understanding of Immune and Microbial Mechanisms in the Pathogenesis of Inflammatory Bowel Disease
Source: Vet Sci. 2022 May 16;9(5):238. doi: 10.3390/vetsci9050238 (PMC9147231; doi:10.3390/vetsci9050238)
Supplement: Supplementary file 1 [file vetsci-09-00238-s001.zip › vetsci-1683865-supplementary.pdf]

**Table S1.** Levels of selected cytokines in colon tissue.

|                         | Cytokine      | Group             |                   |
|-------------------------|---------------|-------------------|-------------------|
|                         |               | DSS               | C                 |
| pg/mg of tissue protein | IL-1 $\alpha$ | 0.467 $\pm$ 0.108 | 0.245 $\pm$ 0.219 |
|                         | IL-1 $\beta$  | 132.80 $\pm$ 44.1 | 11.08 $\pm$ 0.727 |
|                         | IL-2          | 0.362 $\pm$ 0.049 | 0.145 $\pm$ 0.072 |
|                         | IL-4          | 0.022 $\pm$ 0.006 | 0.023 $\pm$ 0.009 |
|                         | IL-5          | 0.583 $\pm$ 0.096 | 0.261 $\pm$ 0.081 |
|                         | IL-6          | 0.026 $\pm$ 0.006 | 0.028 $\pm$ 0.008 |
|                         | IL-10         | 0.628 $\pm$ 0.138 | 0.699 $\pm$ 0.350 |
|                         | IL-12p70      | 3.892 $\pm$ 0.861 | 1.260 $\pm$ 0.179 |
|                         | IL-13         | 0.179 $\pm$ 0.062 | 0.422 $\pm$ 0.394 |
|                         | G-CSF         | 1.742 $\pm$ 0.862 | 0.518 $\pm$ 0.499 |
|                         | TNF- $\alpha$ | 0.857 $\pm$ 0.546 | 0.243 $\pm$ 0.102 |

Values are expressed as mean  $\pm$  SEM ( $n = 16/\text{DSS group}$ ;  $n = 6/\text{C group}$ ). Abbreviations: IL, interleukin; G-CSF, granulocyte colony-stimulating factor; TNF- $\alpha$ , tumour necrosis factor  $\alpha$ . DSS, induced colitis; C, healthy control.

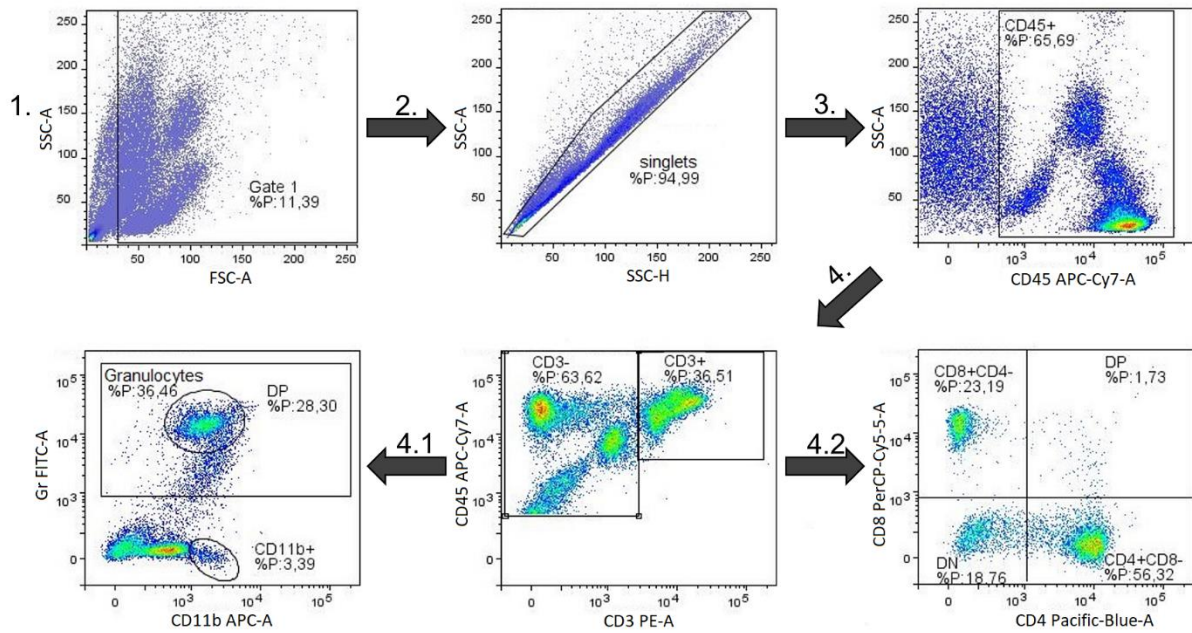

**Figure S1.** Representative flow cytometry gating strategy for identification of T-cell subsets and neutrophils in the blood.

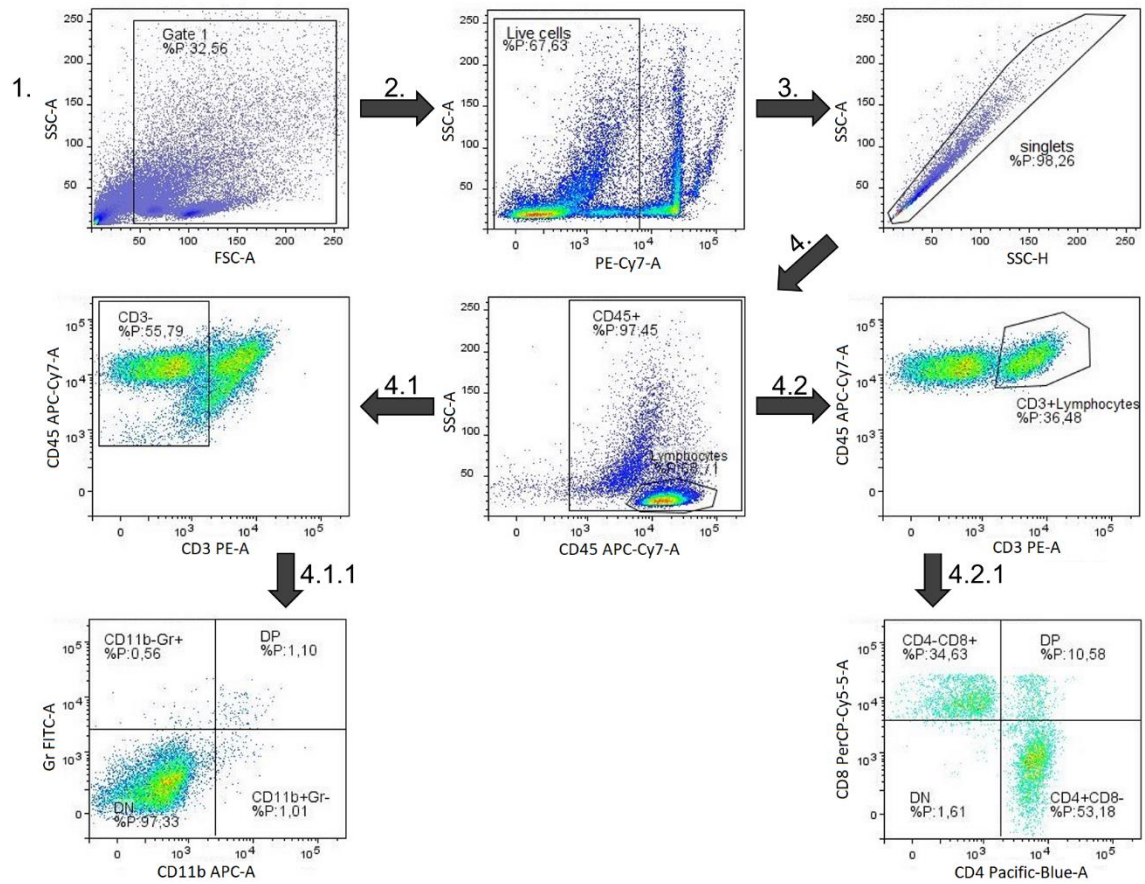

**Figure S2.** Representative flow cytometry gating strategy for identification of T-cell subsets and neutrophils in the colon tissue.

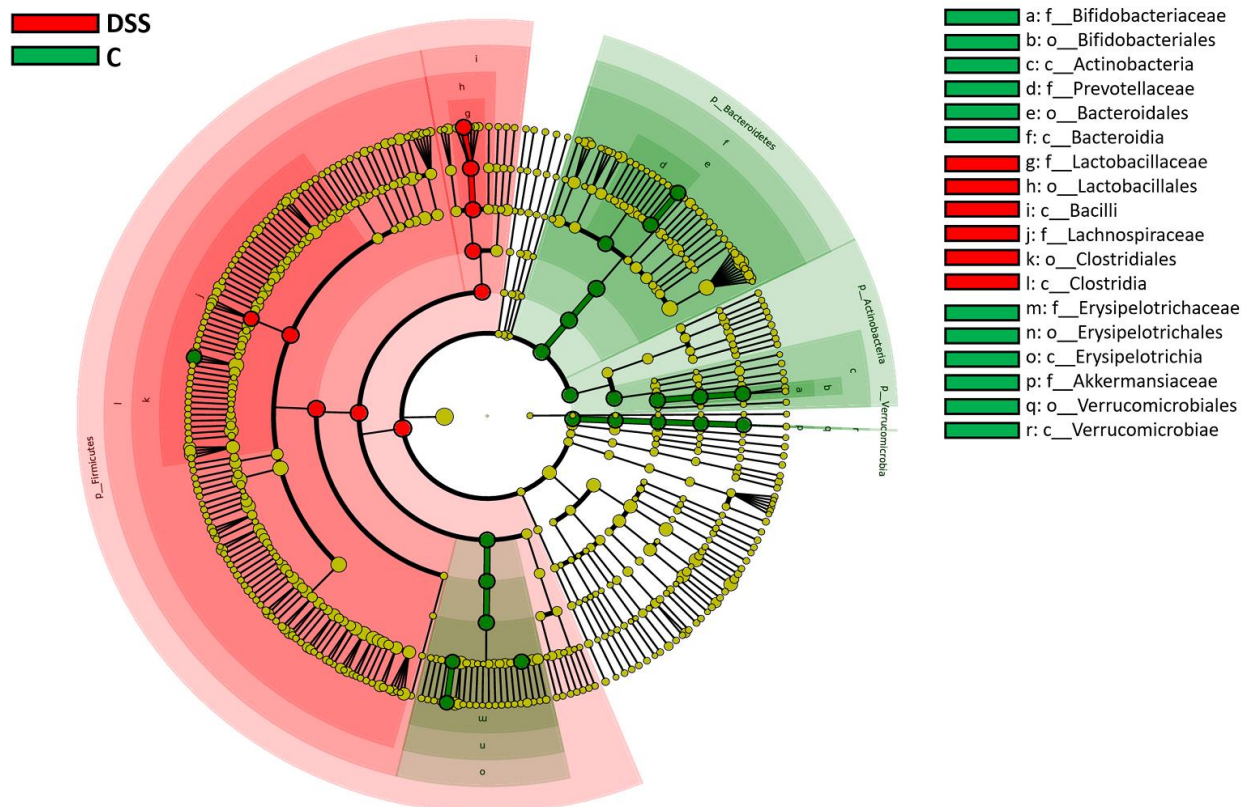

**Figure S3.** The cladogram plotted from LefSe analysis showing taxa enriched in the DSS (red) and control (green) groups. The red and green circles mean that DSS and C showed differences in relative abundance and yellow circles mean non-significant differences. The name of the taxon level is abbreviated as c-class; o-order and f-family. DSS, induced colitis; C, healthy control.

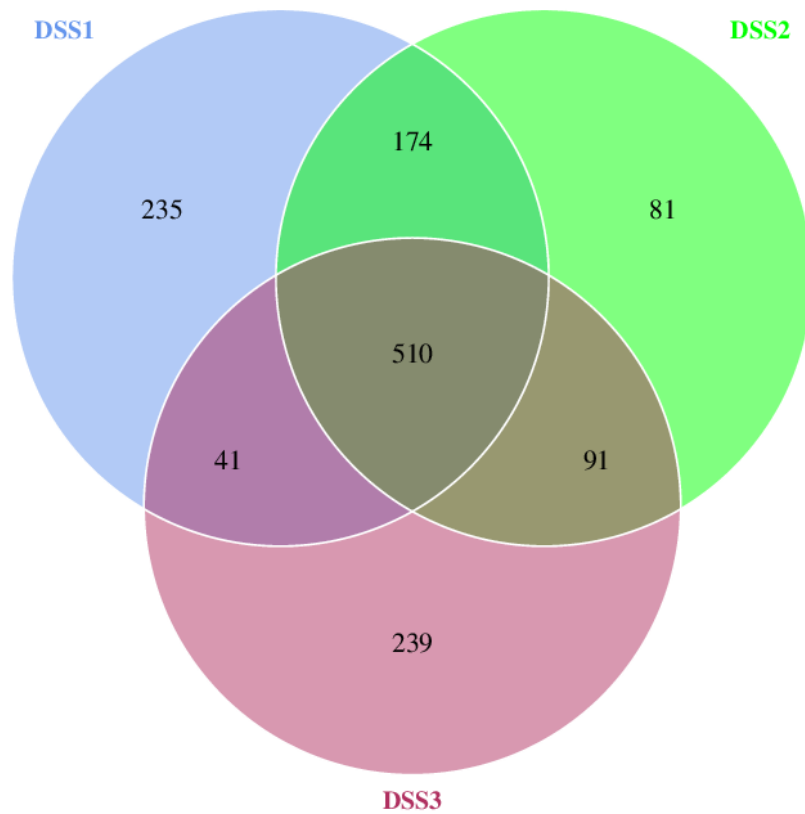

**Figure S4.** Venn diagrams for overlap of observed operational taxonomic units (OTUs) in faecal samples within DSS group collected at three different time points: 1, before induction of colitis (day 1); 2, at the end of DSS administration (day 7); 3, at the end of experiment (day 13). DSS, induced colitis.
